# Supplementary material for: Evaluation of Direct Detection Protocols for Poliovirus from Stool Samples of Acute Flaccid Paralysis Patients
Source: MDPI journal article supplement (doi:10.3390/v15102113), 2023-10-18
Supplement: s1 [file s1]

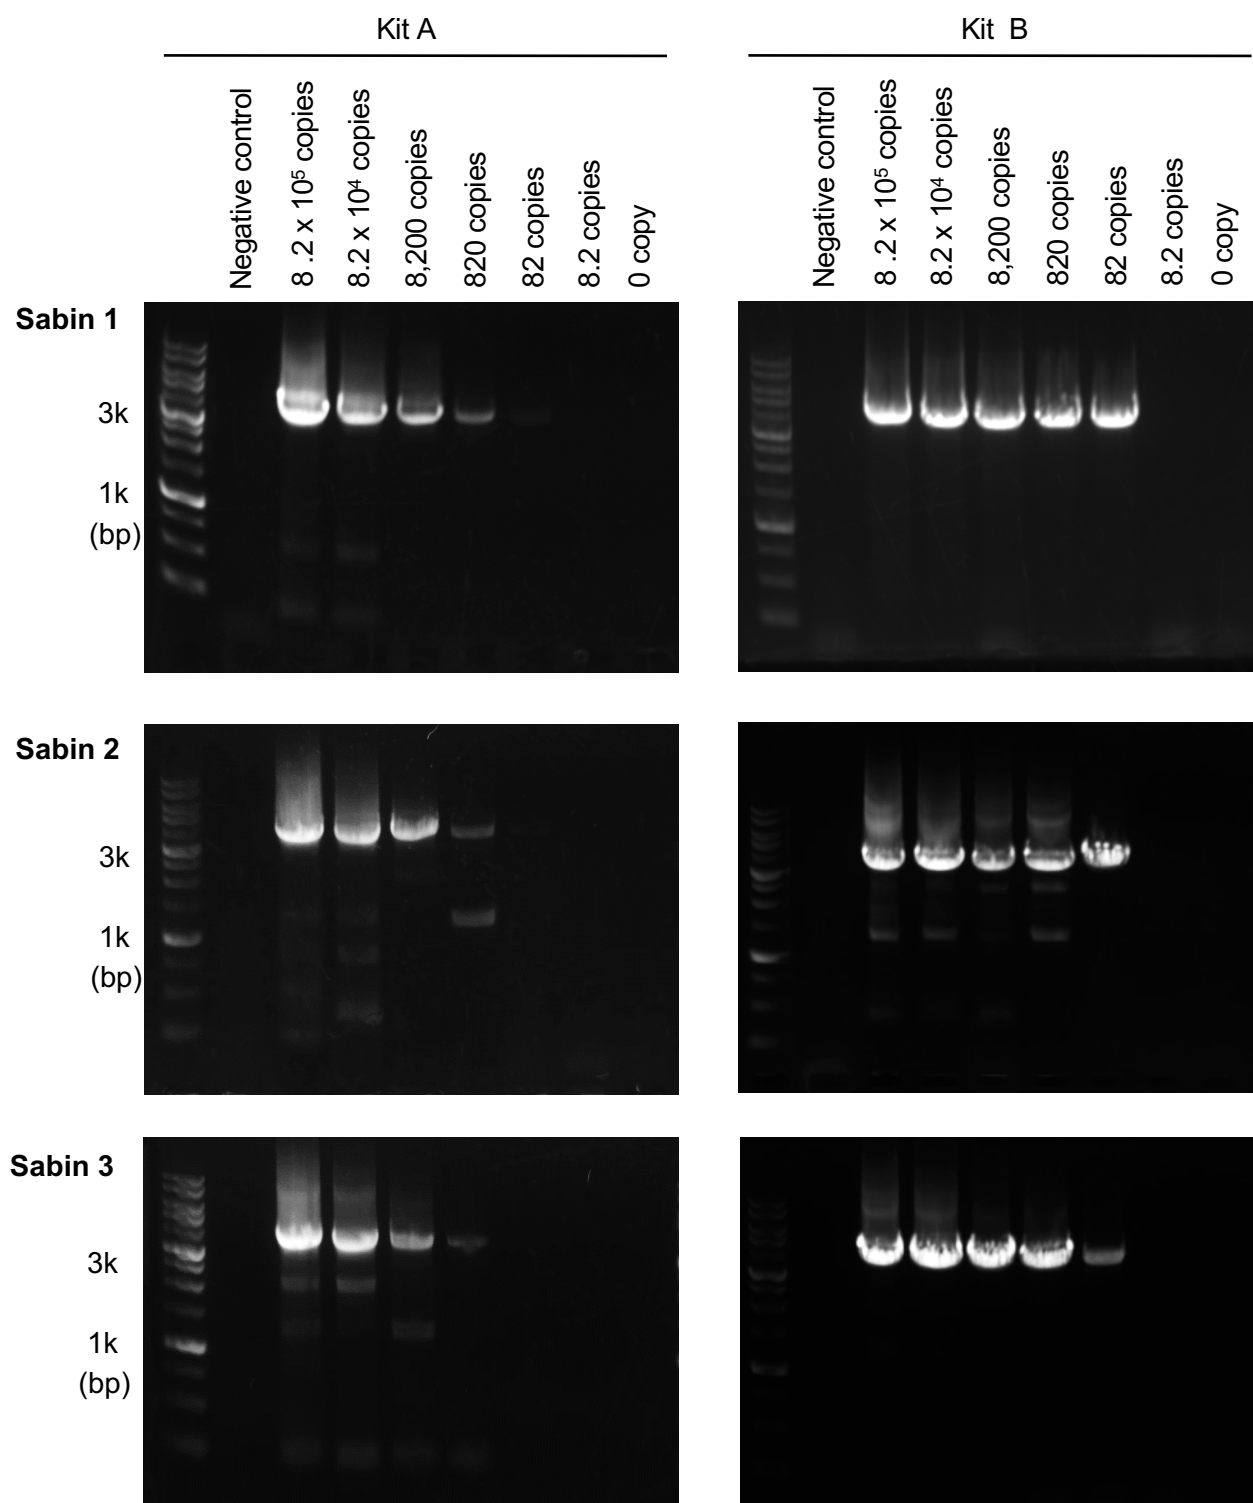

LOD of Sabin 1, 2 and 3: EC RT-PCR (3.9k bp)

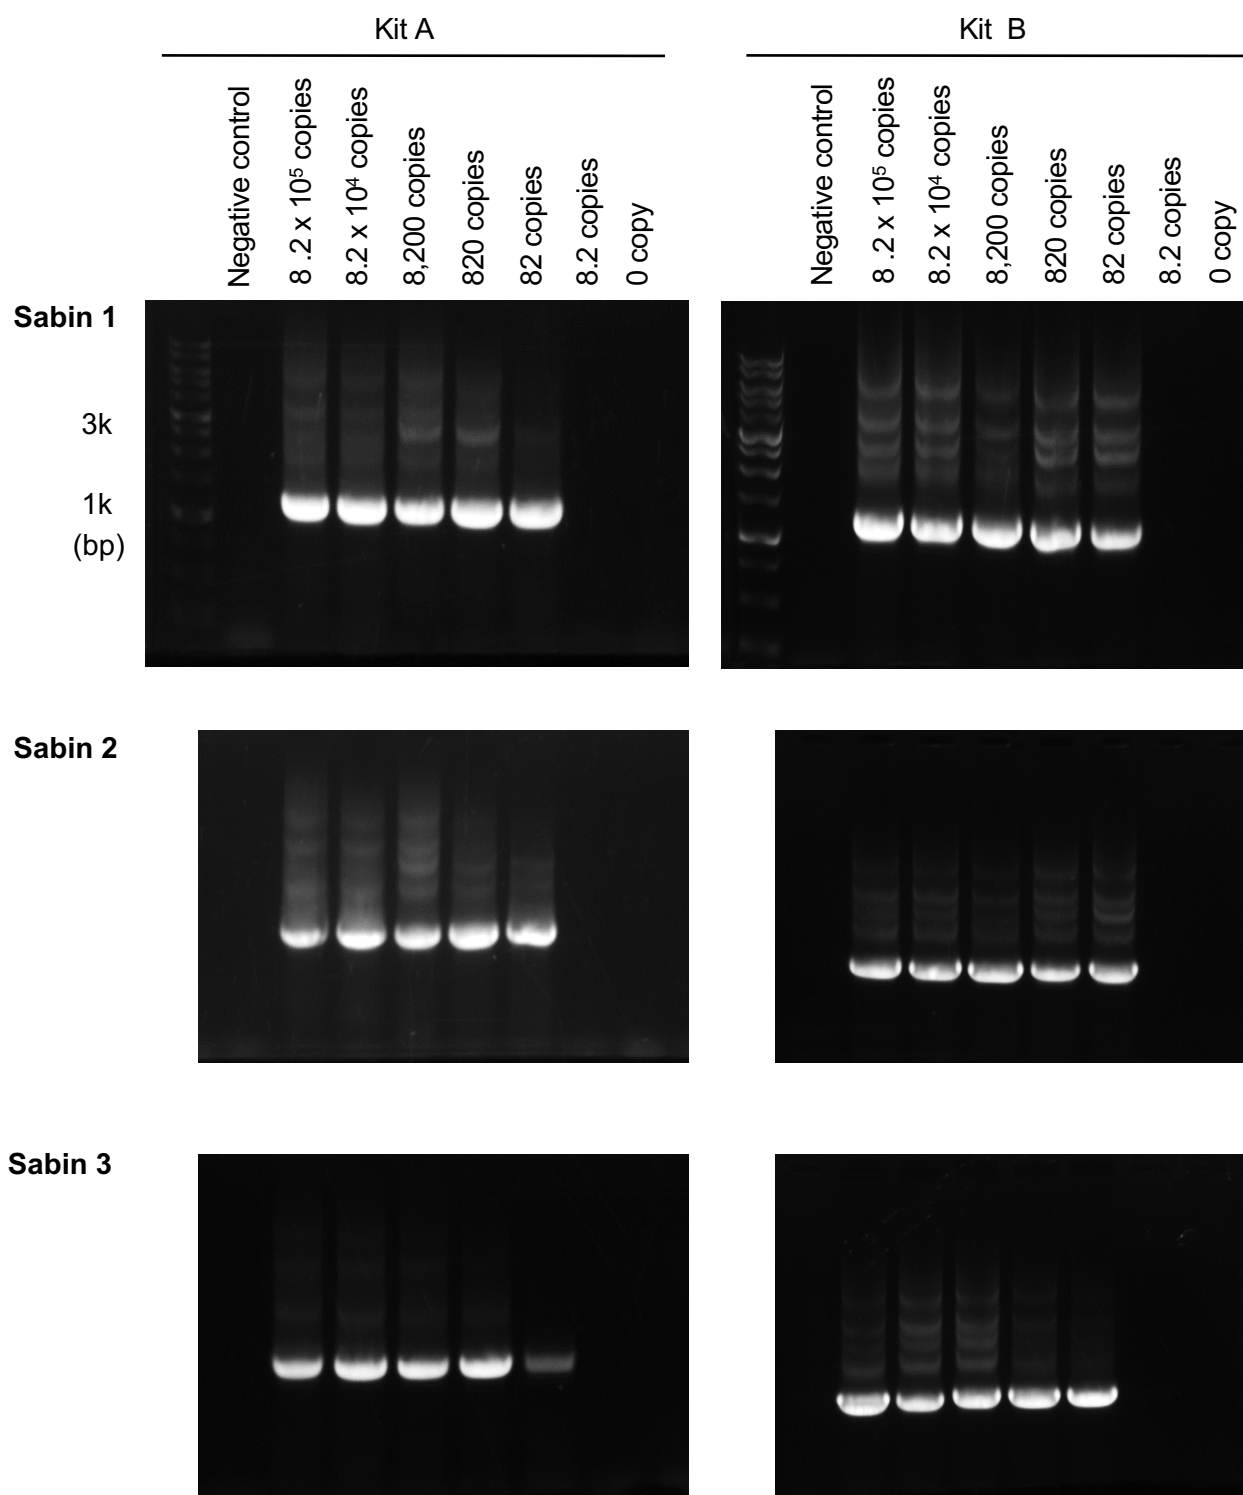

LOD of Sabin 1, 2 and 3 : Pan-PV-VP1 PCR with barcoded primers (1.2k bp)

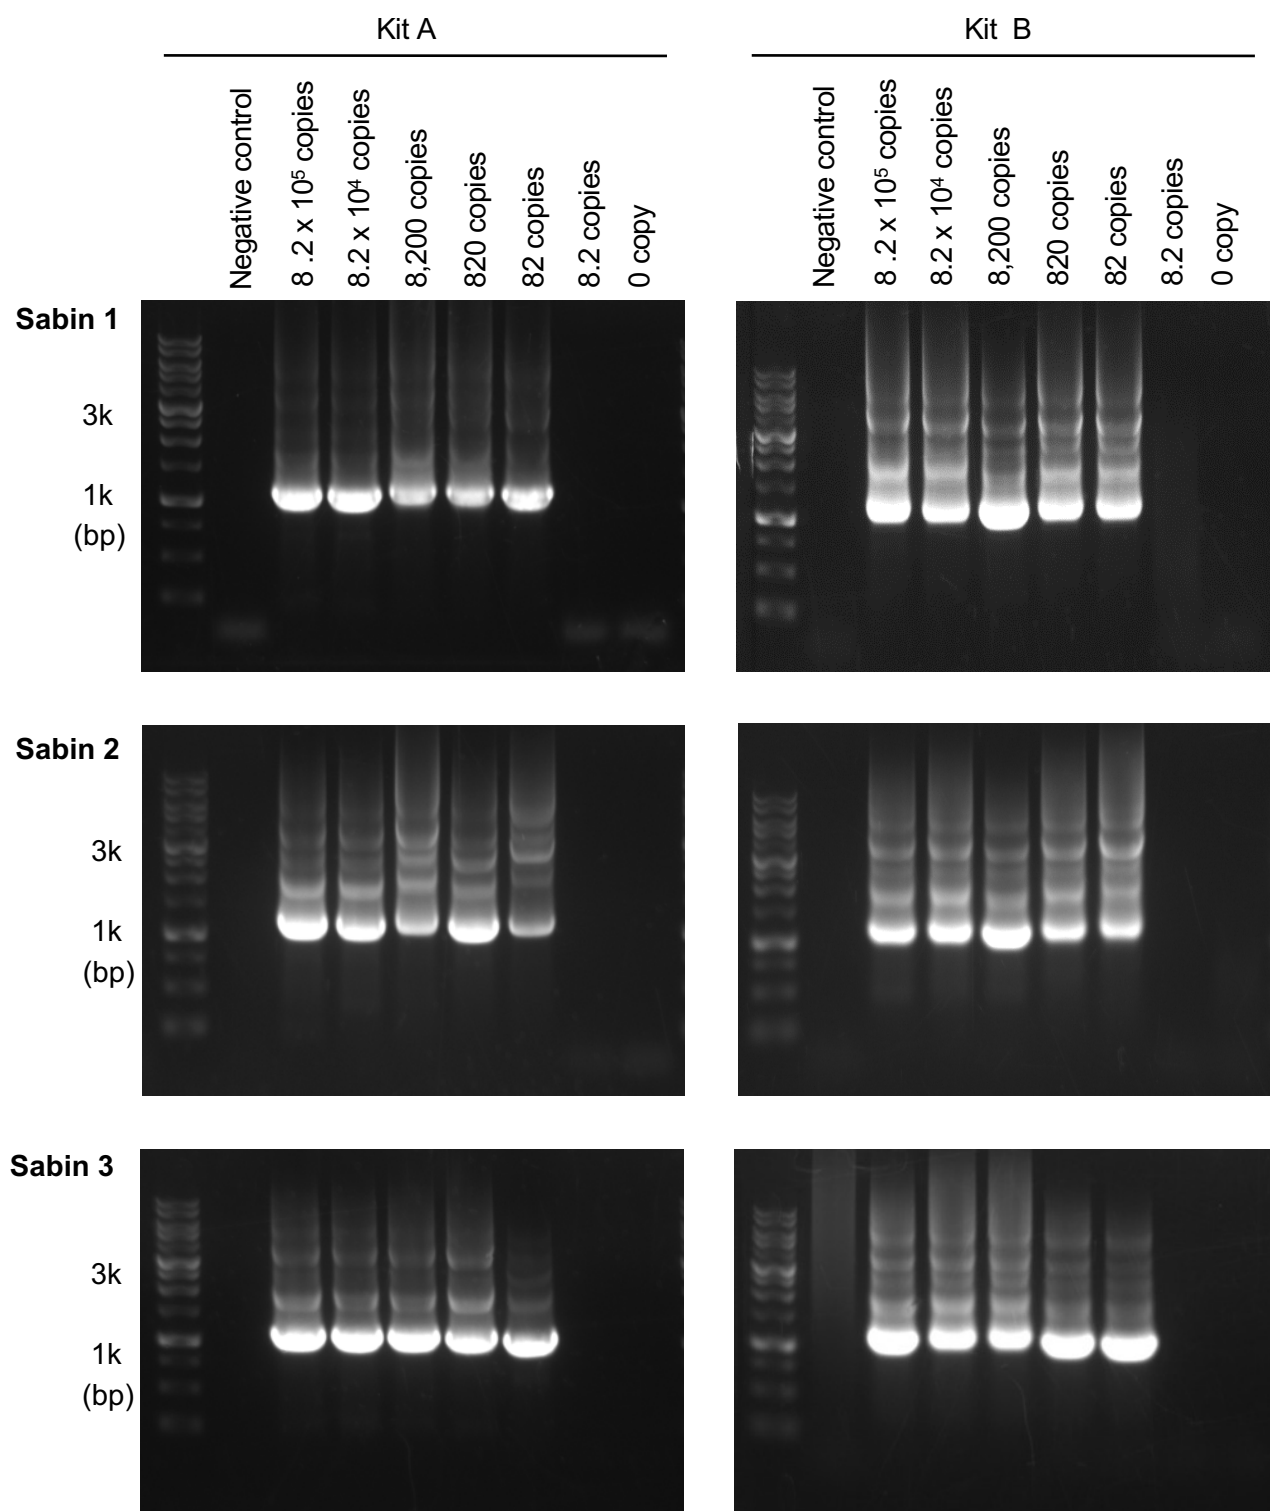

LOD of Sabin 1, 2 and 3 : Pan-PV-VP1 PCR (1.0k bp)

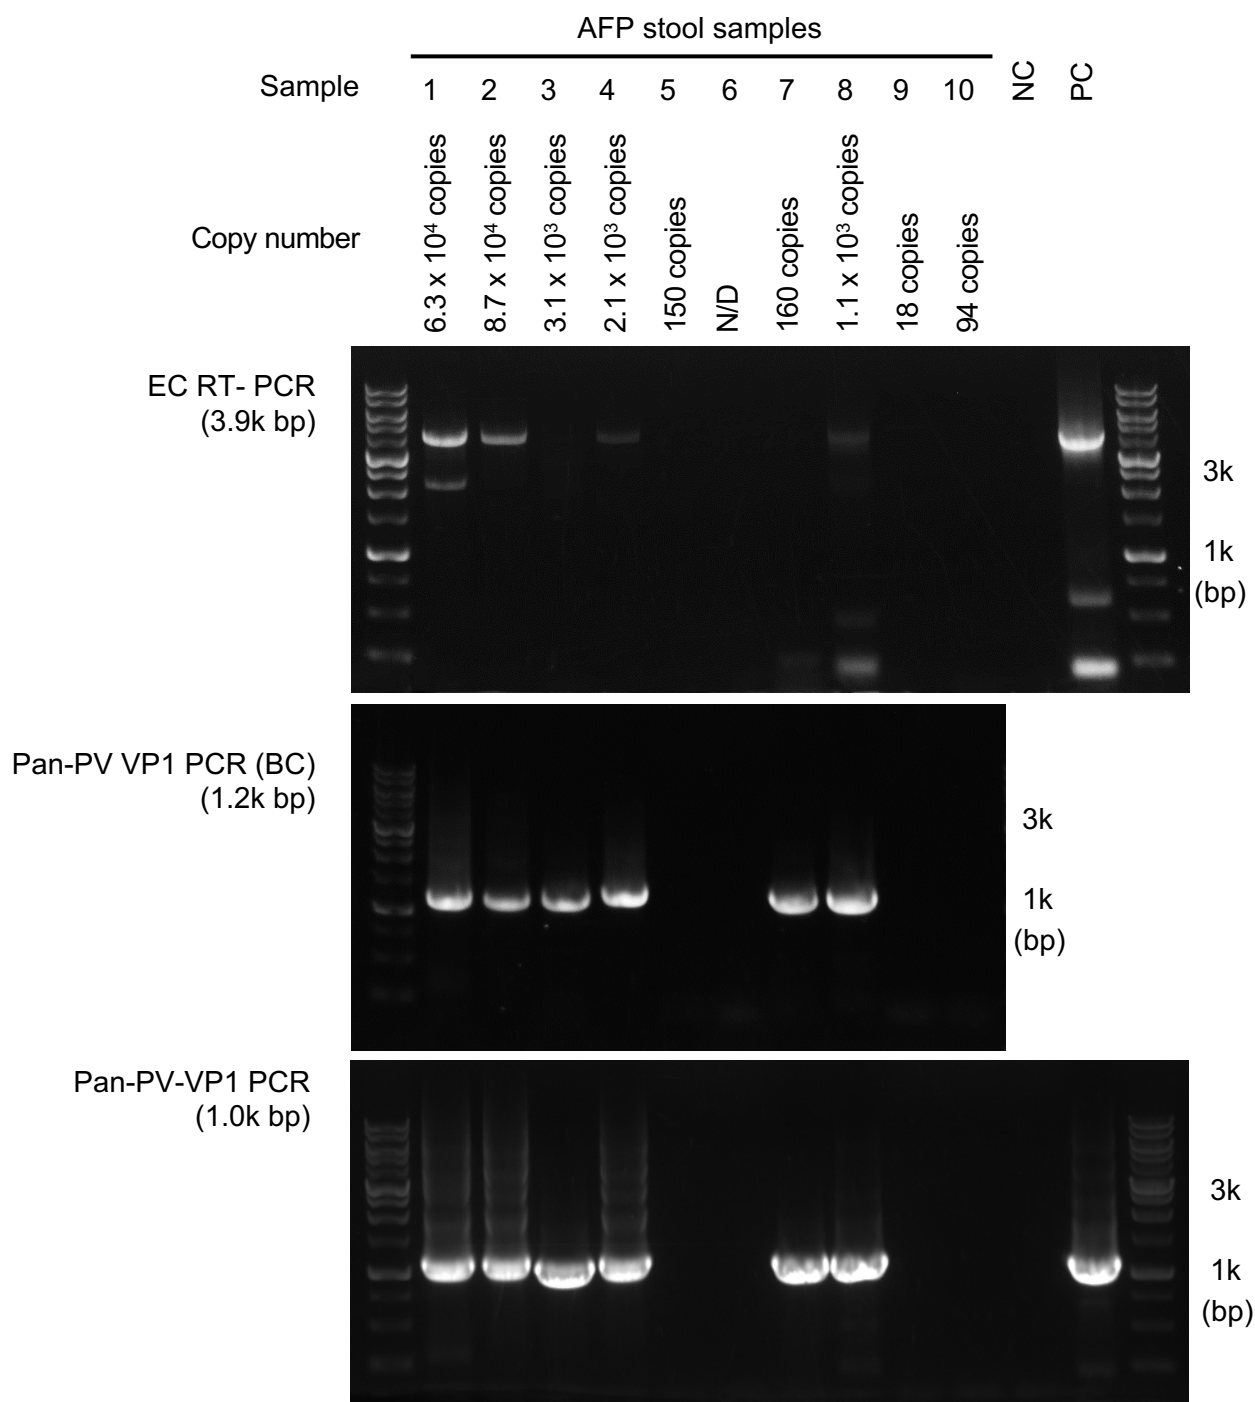

DD of PV from stool samples of AFP cases by kit A: Detection of VP1 region \_1

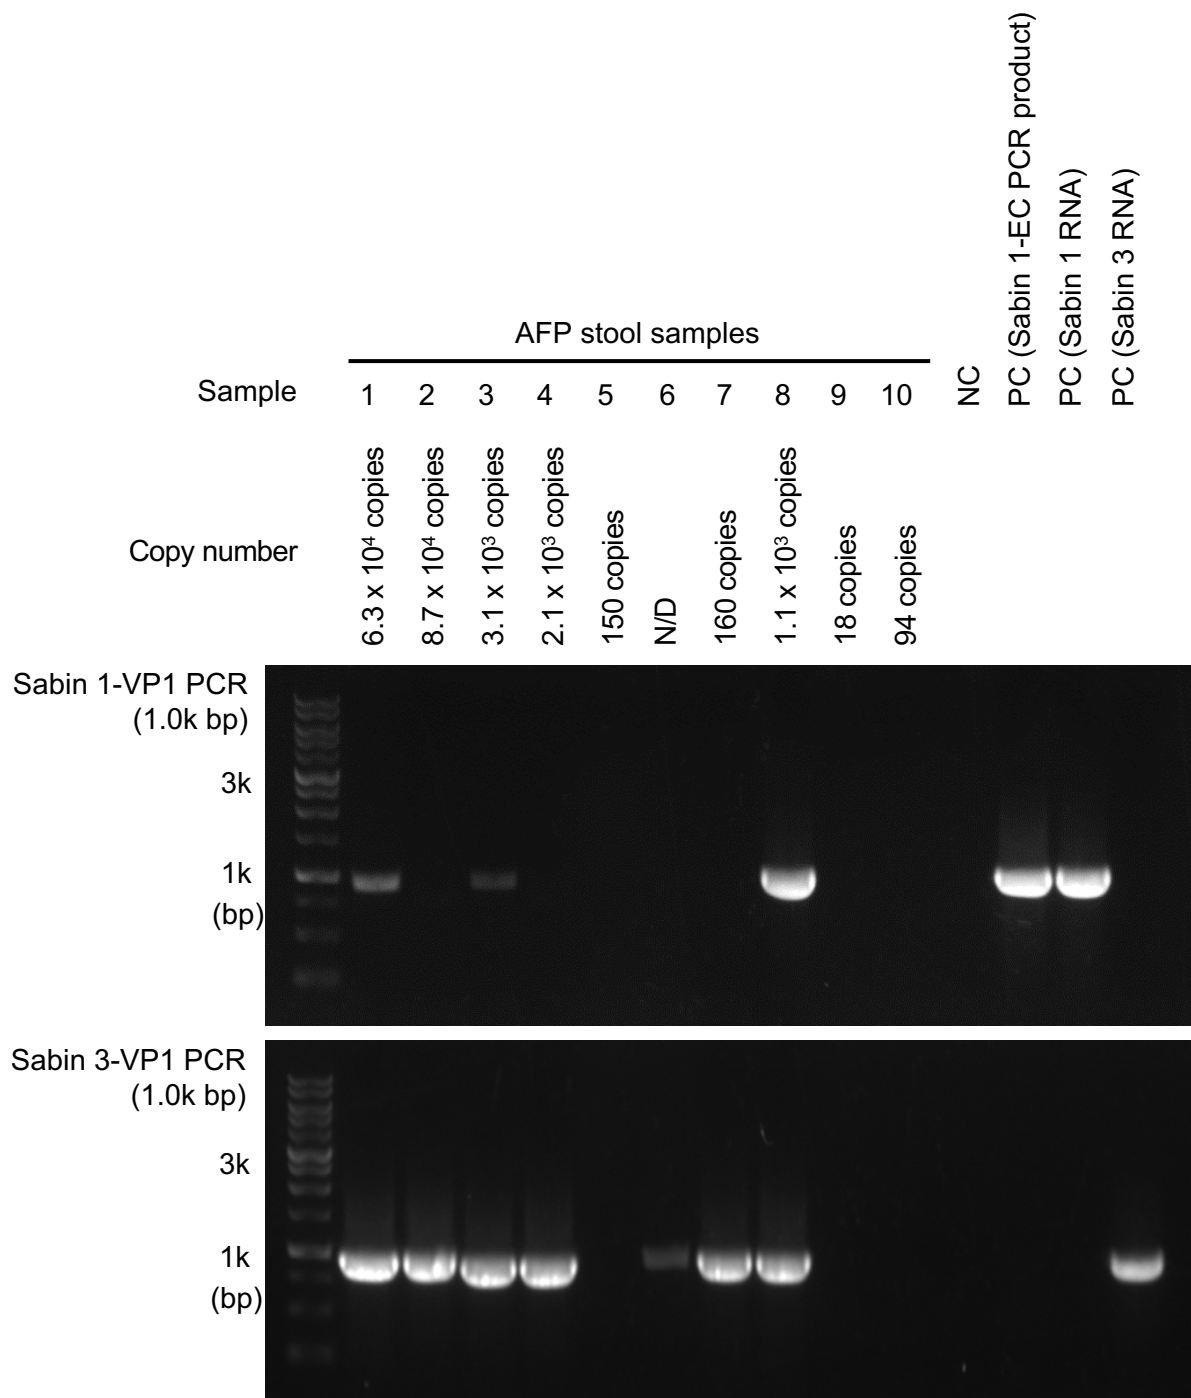

DD of PV from stool samples of AFP cases by kit A: Detection of VP1 region \_2

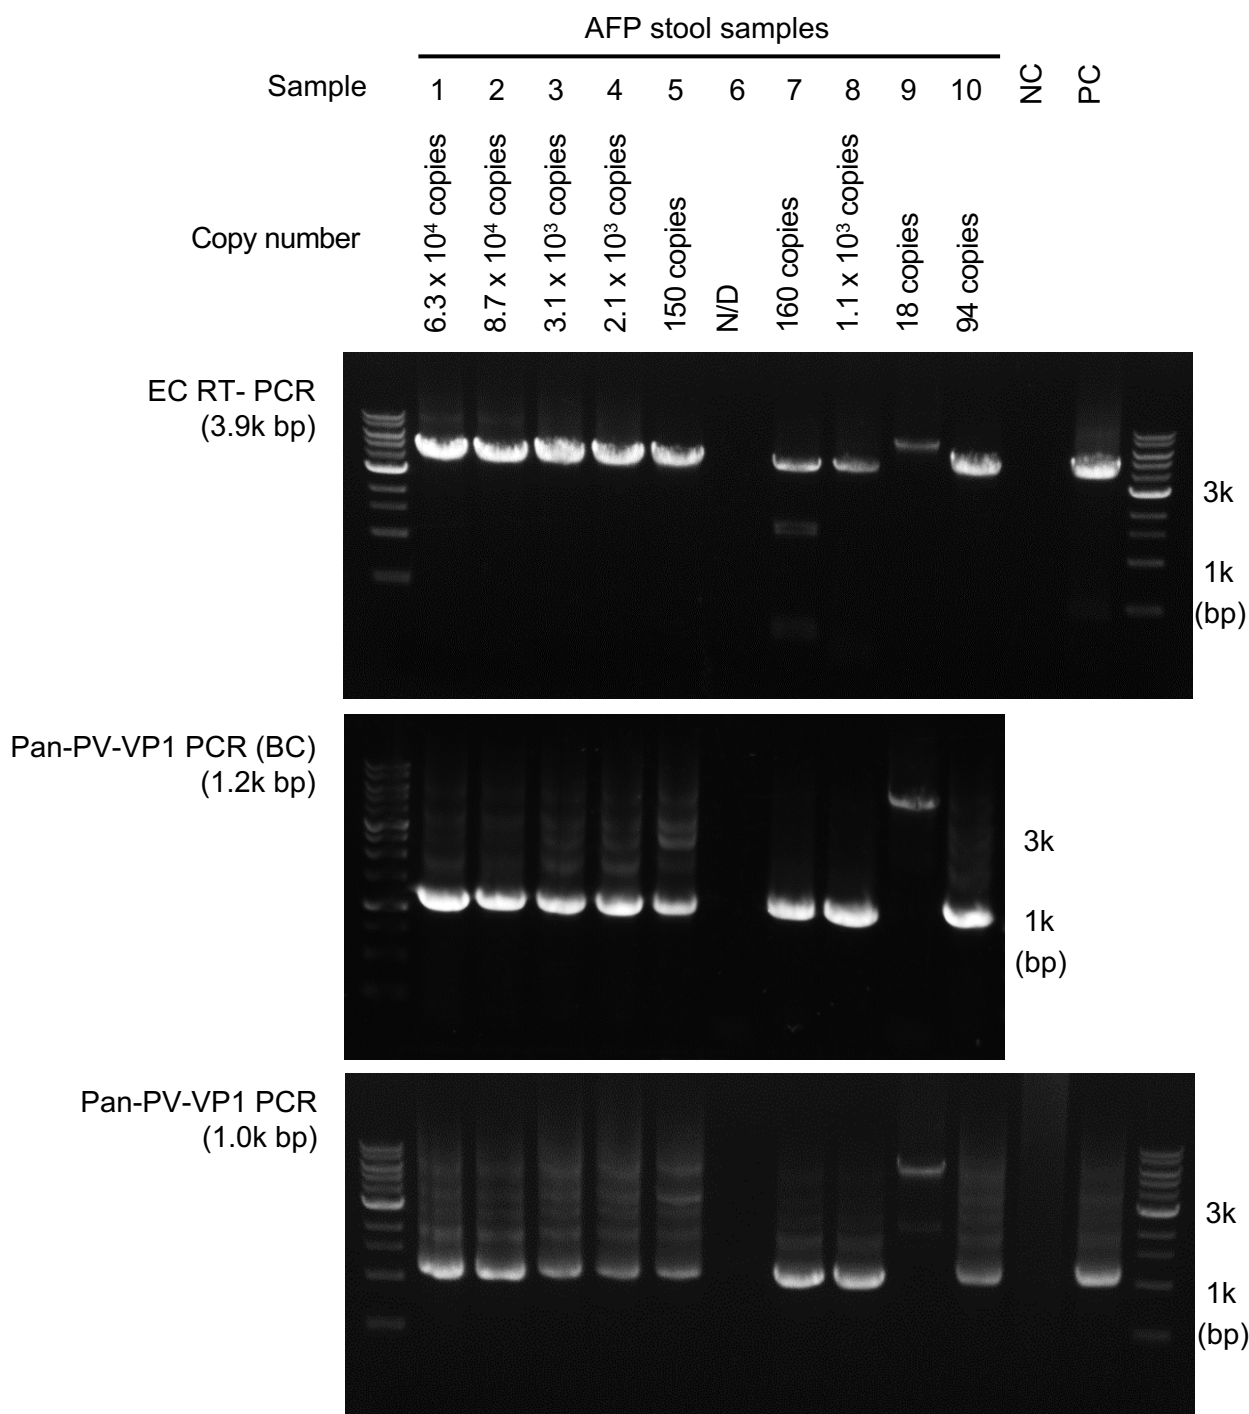

DD of PV from stool samples of AFP cases by kit B: Detection of VP1 region \_1

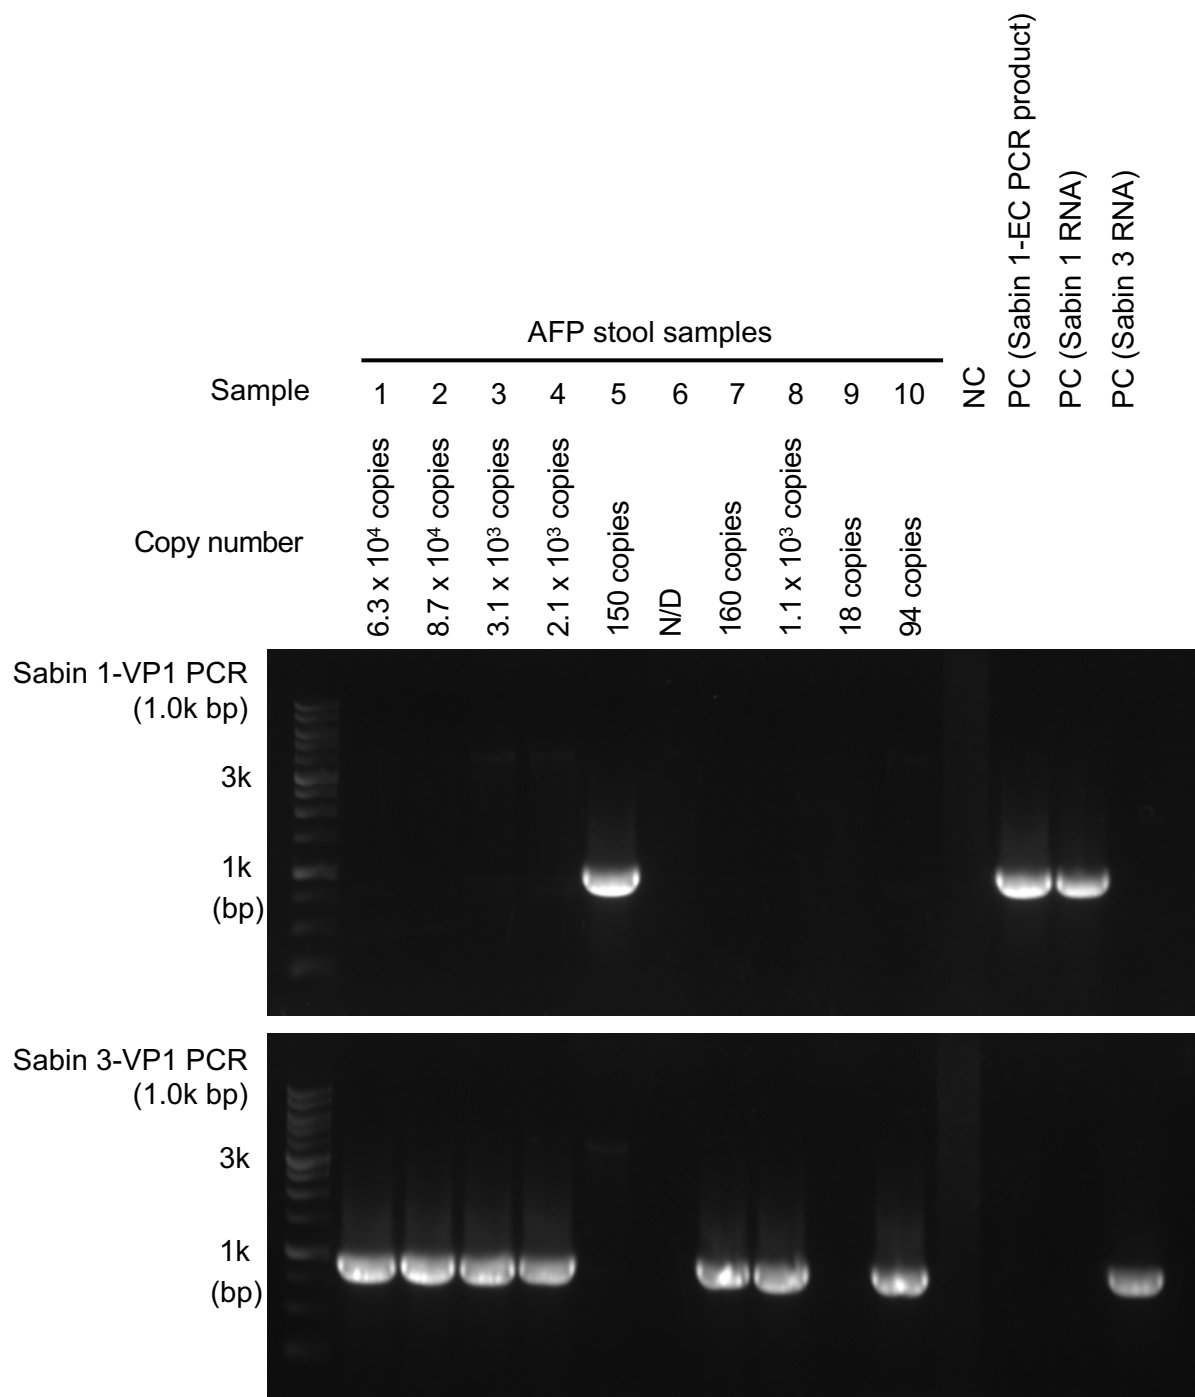

DD of PV from stool samples of AFP cases by kit B: Detection of VP1 region \_2

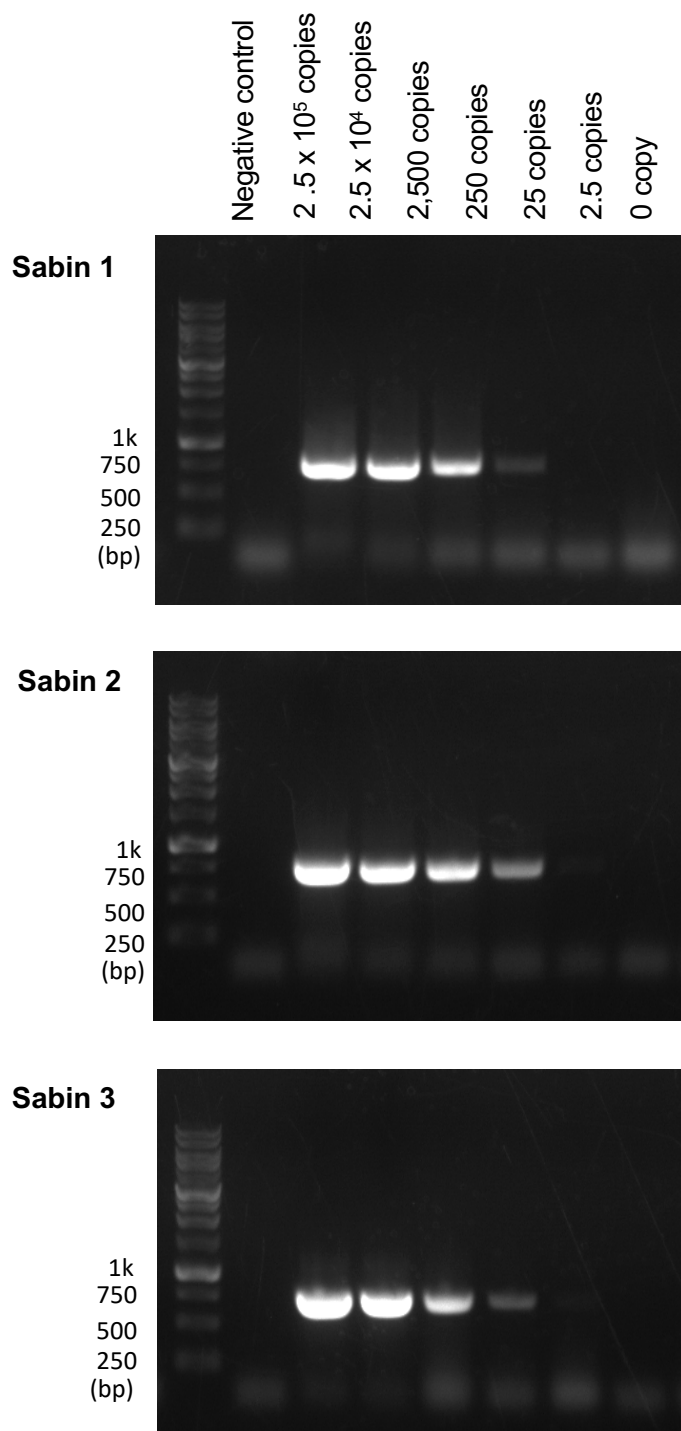

LOD of Sabin 1, 2 and 3: VP4-VP2 semi-nested RT-PCR (1st PCR: 750 bp)

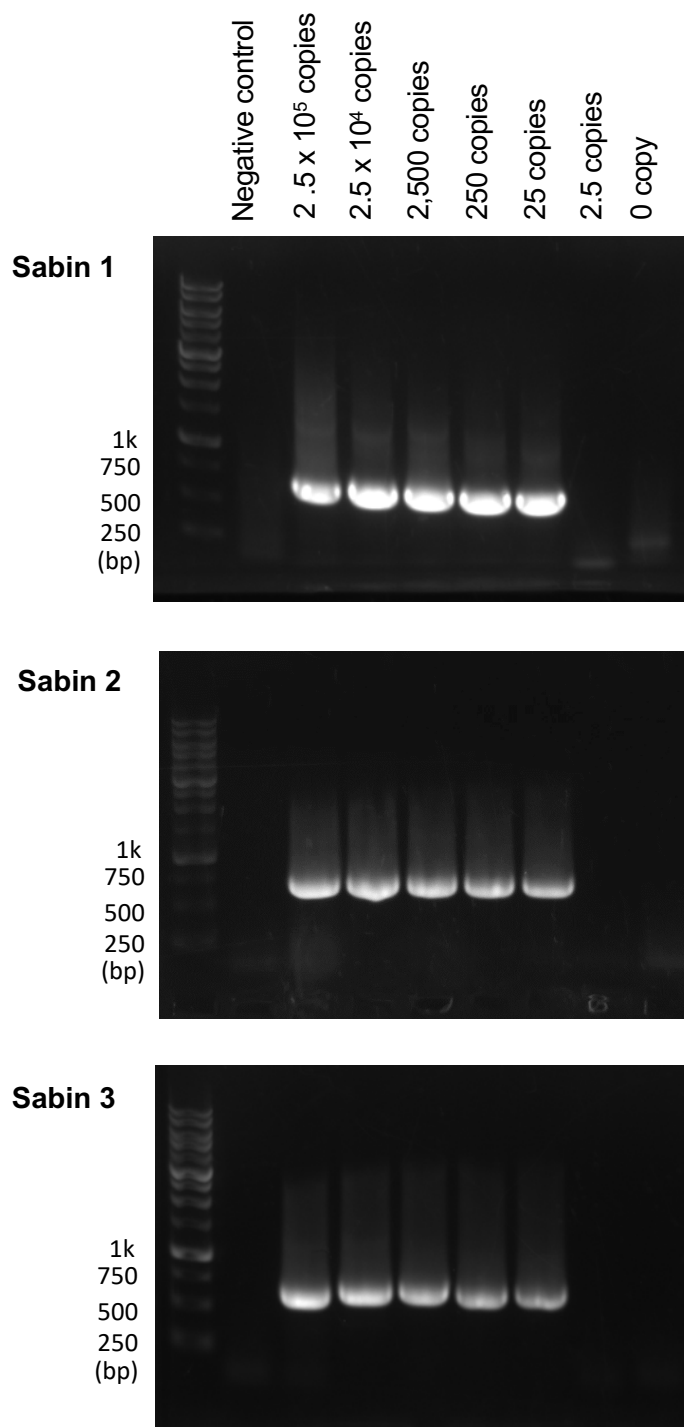

**LOD of Sabin 1, 2 and 3: VP4-VP2 semi-nested RT-PCR (2nd PCR: 650 bp)**

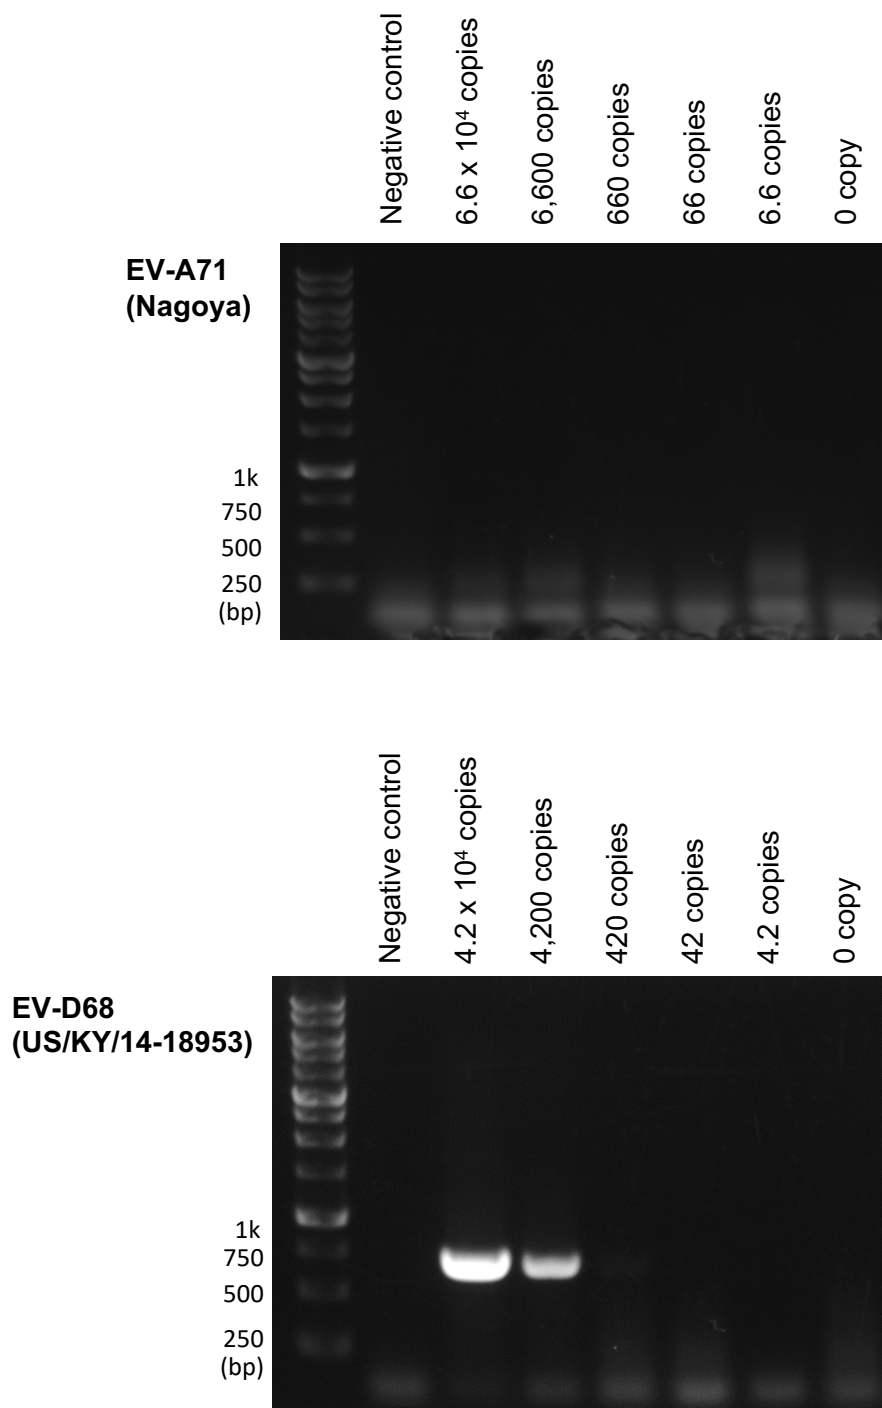

**LOD of EV-A71 (Nagoya) and EV-D68 (US/KY/14-18953)  
: VP4-VP2 semi-nested RT-PCR (1st PCR: 750 bp)**

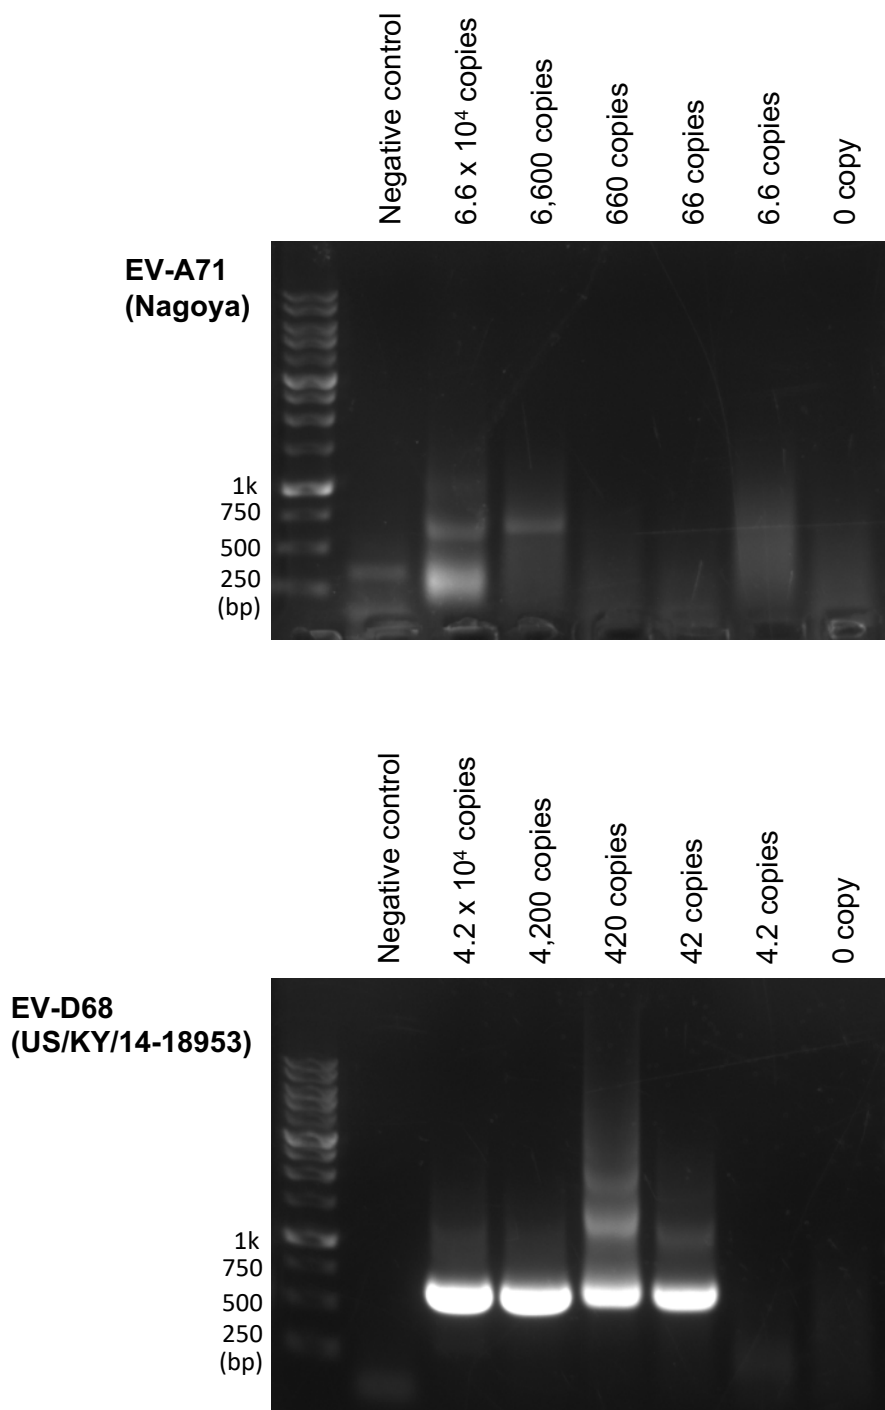

**LOD of EV-A71 (Nagoya) and EV-D68 (US/KY/14-18953)  
: VP4-VP2 semi-nested RT-PCR (2nd PCR: 650 bp)**

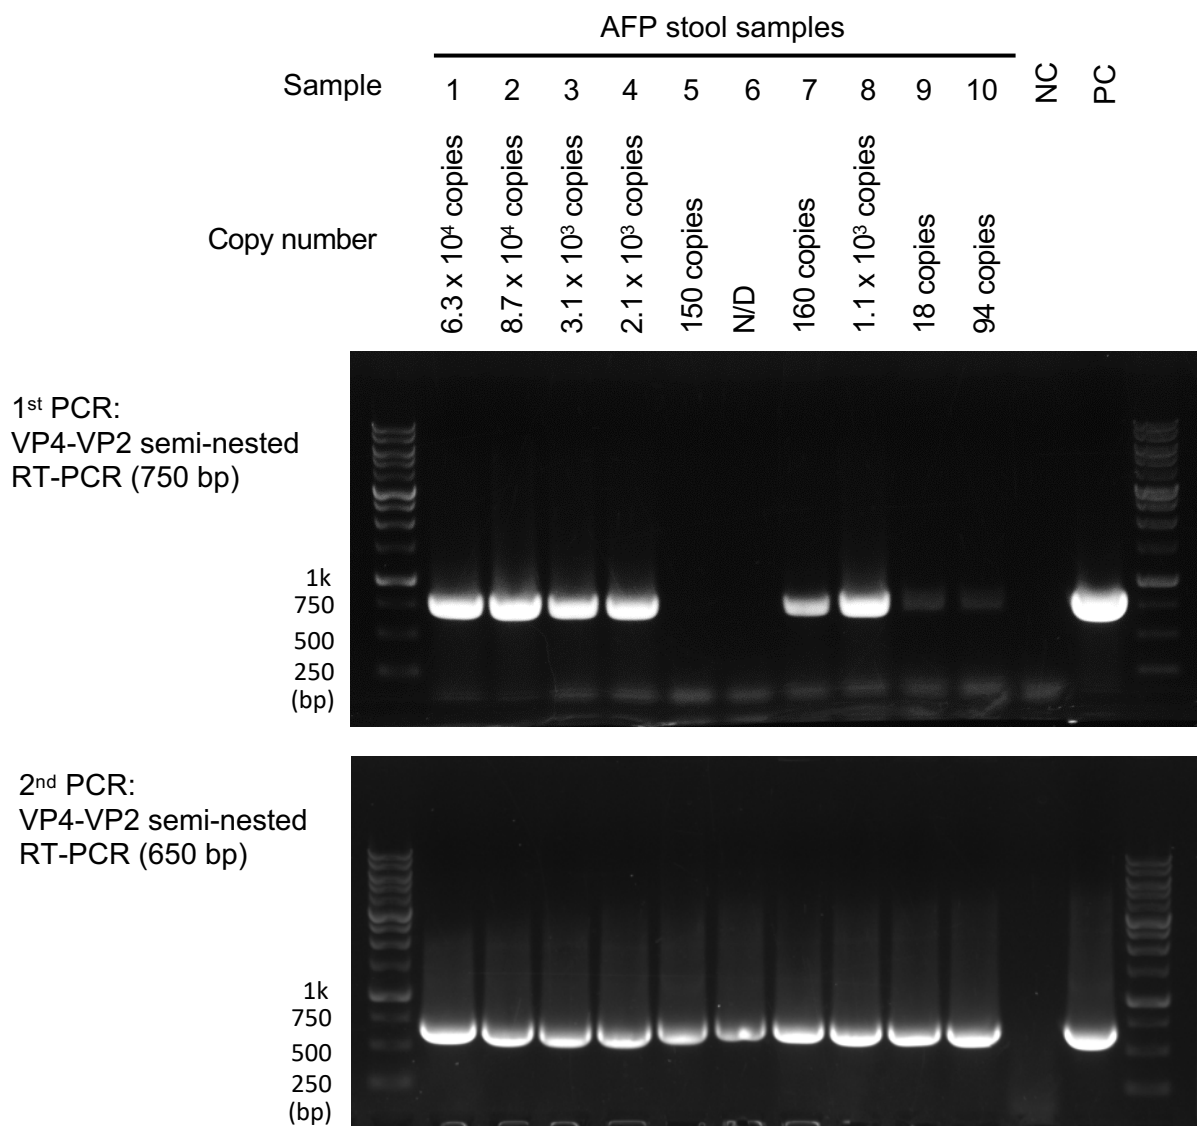

**DD of PV from stool samples of AFP cases: Detection of VP4-VP2 region**
